# Supplementary material for: Chronic Hepatitis B Infection Is Associated with Increased Molecular Degree of Inflammatory Perturbation in Peripheral Blood
Source: PubMed Central journal article supplement (PMC7472740; doi:10.3390/v12080864), 2020-08-07
Supplement: viruses-12-00864-s001.pdf [file viruses-12-00864-s001.pdf]

**Table S1. Characteristics of study participants.**

| <b>Characteristic</b> | <b>Healthy controls</b> | <b>Previous HBV</b> | <b>Current HBV</b> | <b>P-value</b> |
|-----------------------|-------------------------|---------------------|--------------------|----------------|
| N                     | 83                      | 64                  | 29                 |                |
| Age – y               | 40 (26-53)              | 35 (25-48.7)        | 38 (23-50)         | 0.34           |
| Male – no. (%)        | 37 (44)                 | 32 (50)             | 16 (55)            | 0.58           |

Data represent medians and interquartile ranges (age) and frequencies (male gender). The Kruskal-Wallis test was used to compare distributions of age while the Chi-square test was used to compare frequencies. P-values in bold font are statistically significant.

**Table S2. Biochemical evaluation of clinical groups.**

| Parameter          | unit  | Healthy Controls         | Previous HBV             | Current HBV              | P-value          |
|--------------------|-------|--------------------------|--------------------------|--------------------------|------------------|
| N                  |       | 83                       | 64                       | 29                       |                  |
| IL-1 $\beta$       | pg/mL | 5.95<br>(3.75-17.75)     | 5.26<br>(3.60-10.63)     | 4.75<br>(1.18-15.20)     | 0.5708           |
| IL-4               | pg/mL | 16.81<br>(11.29-7.51)    | 40.01<br>(28.99-52.17)   | 1.83<br>(0.63-9.85)      | <b>&lt;0.001</b> |
| IL-6               | pg/mL | 6.50<br>(3.70-9.40)      | 19.50<br>(7.0-29.40)     | 35.50<br>(22.0-46.15)    | <b>&lt;0.001</b> |
| IL-8               | pg/mL | 6.06<br>(4.60-9.97)      | 5.74<br>(4.79-9.75)      | 11.12<br>(7.03-17.66)    | <b>0.009</b>     |
| IL-10              | pg/mL | 12.0<br>(6.8-19.0)       | 11.0<br>(7.0-17.88)      | 23.0<br>(15.80-33.95)    | <b>&lt;0.001</b> |
| IL-12p70           | pg/mL | 7.64<br>(4-65-16.11)     | 6.3<br>(4.2-10.85)       | 3.9<br>(1.81-12.31)      | <b>0.03</b>      |
| TNF- $\alpha$      | pg/mL | 0<br>(0-5.9)             | 0<br>(0-8.3)             | 43.10<br>(28.45-56.45)   | <b>&lt;0.001</b> |
| IFN- $\gamma$      | pg/mL | 12.30<br>(0-28.0)        | 57.55<br>(37.98-83.75)   | 321.0<br>(100.4-570.8)   | <b>&lt;0.001</b> |
| CCL2               | ng/mL | 52.63<br>(18.59-96.06)   | 182.0<br>(124.1-255.9)   | 96.81<br>(46.41-167.1)   | <b>&lt;0.001</b> |
| CCL5               | ng/mL | 20,169<br>(14,215-3,483) | 46,584<br>(33,753-0,736) | 32,650<br>(17,889-4,330) | <b>&lt;0.001</b> |
| CXCL9              | ng/mL | 206.0<br>(145.5-341.8)   | 470.50<br>(340.9-612.8)  | 583.70<br>(220.1-1,467)  | <b>&lt;0.001</b> |
| CXCL10             | ng/mL | 52.44<br>(9.90-106.7)    | 214.10<br>(141.70-6.50)  | 126.0<br>(78.23-162.10)  | <b>&lt;0.001</b> |
| Fibrinogen         | mg/dL | 222.50<br>(198.30-293.6) | 207.90<br>(187.9-297.9)  | 203.50<br>(176.2-240.5)  | 0.347            |
| CRP                | ng/mL | 4.80<br>(4.0-7.50)       | 4.50<br>(3.53-5.88)      | 4.80<br>(4.0-6.75)       | 0.202            |
| Creatinine         | mg/dL | 1.24<br>(1.09-1.29)      | 1.21<br>(1.04-1.31)      | 1.20<br>(0.83-1.46)      | 0.912            |
| AST                | U/L   | 37.90<br>(33.40-47.50)   | 43.20<br>(33.75-54.30)   | 45.0<br>(34.15-55.50)    | 0.169            |
| ALT                | U/L   | 38.80<br>(32.20-47.20)   | 39.20<br>(33.98-44.88)   | 37.40<br>(33.45-43.45)   | 0.902            |
| Total Bilirubin    | mg/dL | 0.70<br>(0.50-1.0)       | 0.68<br>(0.48-1.0)       | 0.80<br>(0.54-1.15)      | 0.355            |
| Direct Bilirubin   | mg/dL | 0.30<br>(0.19-0.40)      | 0.23<br>(0.12-0.34)      | 0.40<br>(0.30-0.50)      | <b>0.008</b>     |
| Indirect Bilirubin | mg/dL | 0.40<br>(0.28-0.65)      | 0.46<br>(0.30-0.62)      | 0.40<br>(0.27-0.62)      | 0.614            |
| HBVDNA             | IU/mL | -                        | -                        | 23571<br>(14232-1332146) |                  |

Data represent medians and interquartile ranges. The Kruskal-Wallis test was used to compare the distributions of the plasma mediators between the study groups. P-values in bold font are statistically significant.

**Table S3. Molecular perturbation score for each marker between clinical groups.**

| Parameter          | unit      | Healthy Controls    | Previous HBV        | Current HBV         | P-value          |
|--------------------|-----------|---------------------|---------------------|---------------------|------------------|
| N                  |           | 83                  | 64                  | 29                  |                  |
| IL-1 $\beta$       | MDP Score | 0.52<br>(0.41-0.83) | 0.53<br>(0.44-0.71) | 0.71<br>(0.46-0.82) | 0.70             |
| IL-4               | MDP Score | 0.65<br>(0.35-0.95) | 1.48<br>(0.82-2.41) | 1.44<br>(0.92-1.53) | <b>&lt;0.001</b> |
| IL-6               | MDP Score | 0.43<br>(0.20-1.0)  | 1.5<br>(0.34-2.78)  | 3.6<br>(1.82-5.0)   | <b>&lt;0.001</b> |
| IL-8               | MDP Score | 0.50<br>(0.33-0.96) | 0.53<br>(0.38-0.70) | 0.85<br>(0.53-1.83) | <b>0.01</b>      |
| IL-10              | MDP Score | 0.60<br>(0.31-1.0)  | 0.66<br>(0.28-0.91) | 0.78<br>(0.27-1.79) | 0.73             |
| IL-12p70           | MDP Score | 0.65<br>(0.38-0.90) | 0.65<br>(0.32-0.82) | 1.0<br>(0.67-1.11)  | <b>0.009</b>     |
| TNF- $\alpha$      | MDP Score | 0.57<br>(0.36-0.57) | 0.57<br>(0.43-0.57) | 2.6<br>(1.5-3.6)    | <b>&lt;0.001</b> |
| IFN- $\gamma$      | MDP Score | 0.59<br>(0.34-0.90) | 1.77<br>(0.91-3.0)  | 14.0<br>(3.77-25.7) | <b>&lt;0.001</b> |
| CCL2               | MDP Score | 0.58<br>(0.35-0.90) | 1.74<br>(0.96-2.91) | 0.73<br>(0.36-1.5)  | <b>&lt;0.001</b> |
| CCL5               | MDP Score | 0.71<br>(0.37-1.0)  | 1.43<br>(0.80-2.38) | 0.80<br>(0.47-1.4)  | <b>&lt;0.001</b> |
| CXCL9              | MDP Score | 0.72<br>(0.36-1.0)  | 1.44<br>(0.80-2.39) | 2.2<br>(0.51-8.0)   | <b>&lt;0.001</b> |
| CXCL10             | MDP Score | 0.58<br>(0.35-0.90) | 1.74<br>(0.96-2.91) | 0.70<br>(0.42-1.0)  | <b>&lt;0.001</b> |
| Fibrinogen         | MDP Score | 0.58<br>(0.46-1.0)  | 0.60<br>(0.47-1.1)  | 0.60<br>(0.24-1.0)  | 0.75             |
| CRP                | MDP Score | 0.55<br>(0.32-0.86) | 0.62<br>(0.42-0.82) | 0.53<br>(0.30-0.86) | 0.62             |
| Creatinine         | MDP Score | 0.56<br>(0.33-0.88) | 0.70<br>(0.33-0.97) | 1.34<br>(0.74-2.78) | <b>&lt;0.001</b> |
| AST                | MDP Score | 0.66<br>(0.31-1.0)  | 0.66<br>(0.30-1.0)  | 0.74<br>(0.32-1.2)  | 0.63             |
| ALT                | MDP Score | 0.61<br>(0.32-1.0)  | 0.44<br>(0.18-0.71) | 0.47<br>(0.21-0.76) | 0.05             |
| Total Bilirubin    | MDP Score | 0.75<br>(0.43-1.3)  | 0.75<br>(0.44-1.0)  | 0.73<br>(0.50-1.3)  | 0.94             |
| Direct Bilirubin   | MDP Score | 0.66<br>(0.20-1.25) | 0.61<br>(0.32-1.0)  | 0.66<br>(0.29-1.2)  | 0.87             |
| Indirect Bilirubin | MDP Score | 0.74<br>(0.37-1.0)  | 0.65<br>(0.30-0.98) | 0.74<br>(0.24-1.4)  | 0.23             |

Data represent medians and interquartile ranges. The Kruskal-Wallis test was used to compare the distributions of the plasma mediators between the study groups. P-values in bold font are statistically significant.

**Table S4. Biochemical evaluation of HBeAg+, Anti-HBe+ and control participants.**

| Parameter          | unit      | Healthy Controls      | HBeAg+                  | Anti-HBe+             | P-value           |
|--------------------|-----------|-----------------------|-------------------------|-----------------------|-------------------|
| N                  |           | 83                    | 18                      | 11                    |                   |
| TNF- $\alpha$      | MDP Score | 0.58<br>(0.36 - 0.58) | 2.84<br>(2.24 - 3.77)   | 1.21<br>(0.58 - 2.99) | <b>&lt; 0.001</b> |
| IFN- $\gamma$      | MDP Score | 0.59<br>(0.34 - 0.9)  | 20.63<br>(9.36 - 27.11) | 3.56<br>(1.1 - 14.24) | <b>&lt; 0.001</b> |
| IL-1 $\beta$       | MDP Score | 0.52<br>(0.41 - 0.83) | 0.67<br>(0.45 - 0.9)    | 0.72<br>(0.48 - 0.83) | 0.853             |
| IL-4               | MDP Score | 0.65<br>(0.35 - 0.96) | 1.51<br>(1.19 - 1.55)   | 1.13<br>(0.62 - 1.46) | <b>&lt; 0.001</b> |
| IL-6               | MDP Score | 0.44<br>(0.2 - 1.05)  | 4.03<br>(2.66 - 5.25)   | 3.43<br>(0.32 - 4.1)  | <b>&lt; 0.001</b> |
| IL-8               | MDP Score | 0.5<br>(0.33 - 0.97)  | 0.85<br>(0.61 - 1.18)   | 1.3<br>(0.32 - 2.5)   | 0.052             |
| IL-10              | MDP Score | 0.6<br>(0.32 - 1)     | 0.81<br>(0.28 - 1.93)   | 0.46<br>(0.27 - 1.66) | 0.551             |
| IL-12p70           | MDP Score | 0.65<br>(0.38 - 0.91) | 1.05<br>(0.56 - 1.81)   | 1<br>(0.81 - 1.09)    | <b>0.003</b>      |
| CCL2               | MDP Score | 0.59<br>(0.35 - 0.9)  | 0.54<br>(0.29 - 0.83)   | 1.48<br>(0.82 - 3.02) | <b>0.005</b>      |
| CCL5               | MDP Score | 0.72<br>(0.37 - 1.03) | 0.78<br>(0.51 - 1.34)   | 0.84<br>(0.36 - 1.48) | 0.436             |
| CXCL9              | MDP Score | 0.72<br>(0.36 - 1.02) | 1.98<br>(0.52 - 6.8)    | 2.2<br>(0.52 - 9.39)  | <b>0.002</b>      |
| CXCL10             | MDP Score | 0.59 (0.35 - 0.9)     | 0.87<br>(0.46 - 1.28)   | 0.57<br>(0.1 - 0.83)  | 0.139             |
| CRP                | MDP Score | 0.56<br>(0.33 - 0.87) | 0.5<br>(0.28 - 0.74)    | 0.71<br>(0.45 - 1.03) | 0.260             |
| Fibrinogen         | MDP Score | 0.59<br>(0.46 - 1.09) | 0.65<br>(0.16 - 1.06)   | 0.55<br>(0.42 - 1.1)  | 0.901             |
| AST                | MDP Score | 0.66<br>(0.31 - 1.05) | 0.99<br>(0.65 - 1.26)   | 0.56<br>(0.27 - 1.05) | 0.210             |
| ALT                | MDP Score | 0.62<br>(0.33 - 1.03) | 0.46<br>(0.25 - 0.79)   | 0.48<br>(0.19 - 0.6)  | 0.305             |
| Total Bilirubin    | MDP Score | 0.76<br>(0.43 - 1.33) | 0.76<br>(0.46 - 1.36)   | 0.73<br>(0.55 - 1.06) | 0.837             |
| Direct Bilirubin   | MDP Score | 0.67<br>(0.21 - 1.25) | 0.67<br>(0.5 - 1.25)    | 0.67<br>(0.08 - 1.25) | 0.891             |
| Indirect bilirubin | MDP Score | 0.74<br>(0.37 - 1.07) | 0.68<br>(0.25 - 1.4)    | 0.82<br>(0.37 - 1.48) | 0.761             |
| Creatinine         | MDP Score | 0.57<br>(0.34 - 0.88) | 1.2<br>(0.75 - 3.06)    | 1.54<br>(0.75 - 2.65) | <b>&lt; 0.001</b> |

Data represent medians and interquartile ranges. The Kruskal-Wallis test was used to compare the distributions of the plasma mediators between the study groups. P-values in bold font are statistically significant
